# Supplementary material
Source: publisher figshare collection journal article supplement (https://asha.figshare.com/articles/dataset/_/13172129)
Supplement: Supplementary file 1 [file 1]

**Supplemental Material S4.** Frequency (rate) of errors collapsing across clause types.

| Age         | TL         | LI         |
|-------------|------------|------------|
| 4-Year-Olds | 26 (0.008) | 16 (0.027) |
| 5-Year-Olds | 19 (0.005) | 18 (0.018) |
| 6-Year-Olds | 15 (0.004) | 17 (0.022) |
| 7-Year-Olds | 14 (0.004) | 15 (0.015) |
| 8-Year-Olds | 10 (0.003) | 7 (0.006)  |
| 9-Year-Olds | 6 (0.002)  | 1 (0.001)  |

*Note.* TL = typical language; LI = language impairment. Rate was computed by total number of errors divided by total number of C-units collapsing all children and clause types. Total number of C-units for the TL and LI groups by age can be found in Supplemental Material S3.
