# Supplementary material
Source: publisher figshare collection journal article supplement (https://asha.figshare.com/articles/dataset/_/13172129)
Supplement: Supplementary file 3 [file 1]

**Supplemental Material S3.** Frequency (rate) of usage for each type of dependent clause by language status and age.

|                            | Adverbial<br>Clause | Nominal<br>Clause | Relative<br>Clause | <i>to</i> -<br>Infinitive<br>Clause | <i>to</i> -Infinitive<br>Clause<br>(Excluding<br>Catenatives) | Unmarked<br>Infinitive<br>Clause | Gerund<br>Clause | Present<br>Participle<br>Clause | Past<br>Participle<br>Clause |
|----------------------------|---------------------|-------------------|--------------------|-------------------------------------|---------------------------------------------------------------|----------------------------------|------------------|---------------------------------|------------------------------|
| <i>Typical Language</i>    |                     |                   |                    |                                     |                                                               |                                  |                  |                                 |                              |
| 4-Year-Old (CU = 3306)     | 87 (0.026)          | 259 (0.078)       | 33 (0.010)         | 448 (0.136)                         | 393 (0.134)                                                   | 33 (0.010)                       | 30 (0.010)       | 21 (0.007)                      | 7 (0.002)                    |
| 5-Year-Old (CU = 3550)     | 114 (0.032)         | 292 (0.082)       | 62 (0.017)         | 449 (0.126)                         | 430 (0.121)                                                   | 37 (0.010)                       | 64 (0.018)       | 16 (0.005)                      | 8 (0.002)                    |
| 6-Year-Old (CU = 3528)     | 85 (0.024)          | 243 (0.069)       | 47 (0.013)         | 450 (0.128)                         | 450 (0.128)                                                   | 29 (0.008)                       | 100 (0.028)      | 46 (0.013)                      | 13 (0.004)                   |
| 7-Year-Old (CU = 3672)     | 147 (0.040)         | 344 (0.094)       | 67 (0.018)         | 574 (0.156)                         | 542 (0.148)                                                   | 37 (0.010)                       | 137 (0.037)      | 46 (0.013)                      | 18 (0.005)                   |
| 8-Year-Old (CU = 3919)     | 172 (0.044)         | 478 (0.122)       | 87 (0.022)         | 582 (0.149)                         | 581 (0.148)                                                   | 47 (0.012)                       | 177 (0.045)      | 77 (0.020)                      | 27 (0.007)                   |
| 9-Year-Old (CU = 3876)     | 239 (0.062)         | 507 (0.131)       | 116 (0.030)        | 595 (0.154)                         | 561 (0.154)                                                   | 40 (0.010)                       | 173 (0.045)      | 95 (0.025)                      | 27 (0.007)                   |
| <i>Language Impairment</i> |                     |                   |                    |                                     |                                                               |                                  |                  |                                 |                              |
| 4-Year-Old (CU = 601)      | 7 (0.012)           | 19 (0.032)        | 2 (0.003)          | 46 (0.077)                          | 37 (0.062)                                                    | 7 (0.012)                        | 5 (0.008)        | 1 (0.002)                       | 0 (0)                        |
| 5-Year-Old (CU = 908)      | 20 (0.022)          | 70 (0.077)        | 4 (0.004)          | 109 (0.120)                         | 103 (0.113)                                                   | 1 (0.001)                        | 7 (0.008)        | 2 (0.002)                       | 2 (0.002)                    |
| 6-Year-Old (CU = 777)      | 11 (0.014)          | 56 (0.072)        | 1 (0.001)          | 99 (0.127)                          | 98 (0.126)                                                    | 5 (0.006)                        | 10 (0.013)       | 5 (0.006)                       | 0 (0)                        |
| 7-Year-Old (CU = 987)      | 17 (0.017)          | 79 (0.080)        | 4 (0.004)          | 111 (0.112)                         | 101 (0.102)                                                   | 6 (0.006)                        | 21 (0.021)       | 11 (0.011)                      | 2 (0.002)                    |
| 8-Year-Old (CU = 1223)     | 28 (0.023)          | 90 (0.074)        | 12 (0.010)         | 149 (0.122)                         | 149 (0.122)                                                   | 8 (0.007)                        | 39 (0.032)       | 14 (0.011)                      | 1 (0.001)                    |
| 9-Year-Old (CU = 799)      | 26 (0.033)          | 116 (0.145)       | 13 (0.016)         | 105 (0.131)                         | 98 (0.123)                                                    | 2 (0.003)                        | 19 (0.021)       | 8 (0.010)                       | 4 (0.005)                    |

*Note.* Rate was computed by total number of clauses by total number of C-units that were included for analysis.
